# Supplementary material for: Corticosterone Impairs Hippocampal Neurogenesis and Behaviors through p21-Mediated ROS Accumulation
Source: MDPI journal article supplement (doi:10.3390/biom14030268), 2024-02-23
Supplement: s1 [file s1]

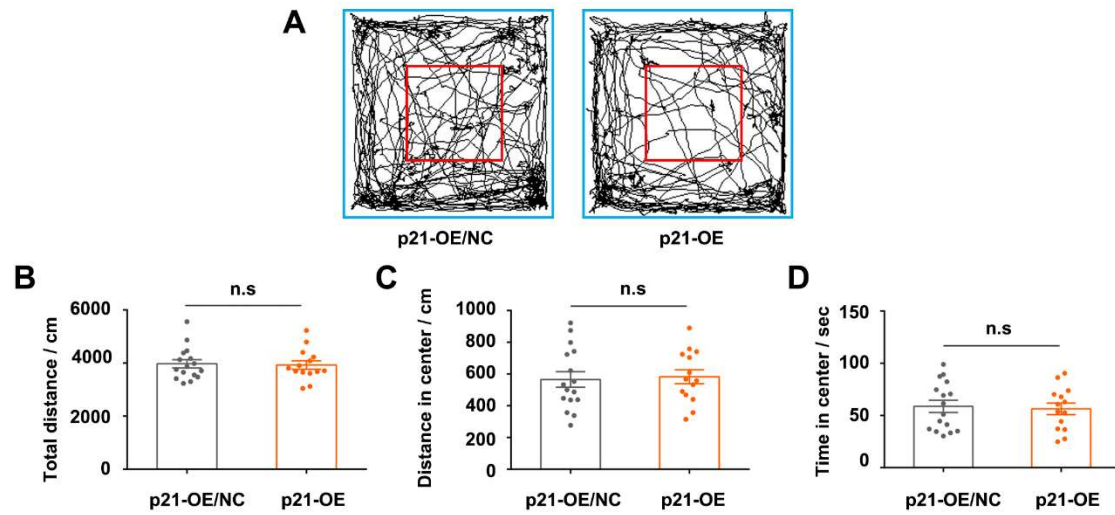

**Supplementary Figure 1. P21-overexpression does not influence the locomotor activity of mice.** **A.** Representative trajectory diagram of the mice in the open field test. **B.** Total distance traveled by mice in the whole area of the apparatus. **C, D.** Distance traveled (**C**) and time spent (**D**) by mice in the central zone of the open field.

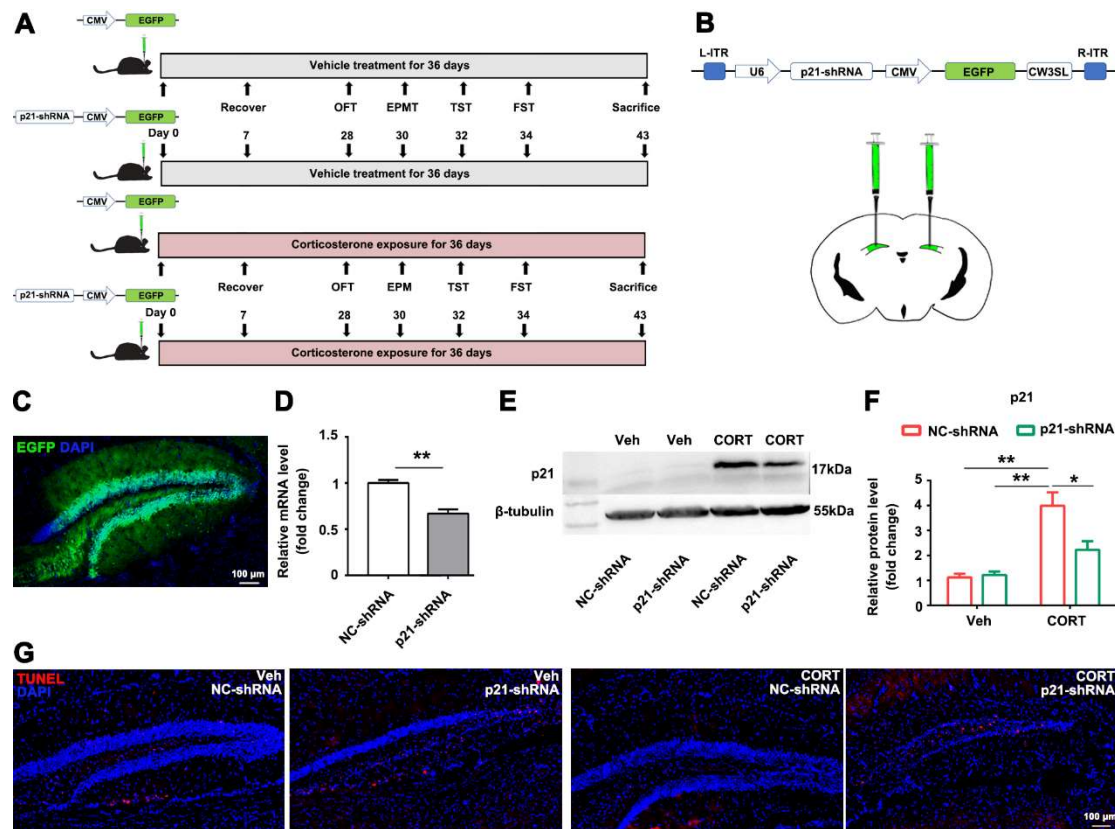

**Supplementary Figure 2. P21-knockdown caused apoptosis of granular neurons.** **A.** Study design. **B.** Schematic representation of stereotaxic injection of AAV vectors into the bilateral DG areas of mice brain. **C.** Visualization of AAV vectors in hippocampus by mNeonGreen fluorescence. **D.** Analysis of p21 mRNA expression level. **E, F.** Western blot analysis (**E**) and quantification (**F**) of p21 protein expression level. **G.** Representative images of TUNEL staining within the dentate gyrus (DG) area. Data are presented as mean  $\pm$  SEM,  $n = 3$  per group. The Student's  $t$  test or one-way ANOVA was performed to compare the means for two or four groups, respectively.  $*P < 0.05$ ,  $**P < 0.01$ . NC: negative control.

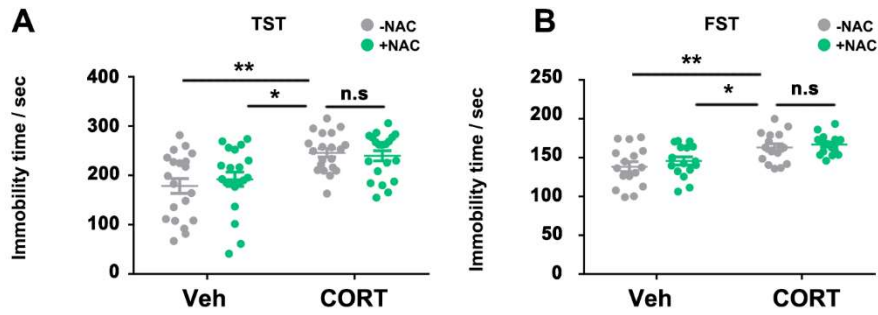

**Supplementary Figure 3. Antioxidant does not attenuate CORT-induced depressive-like behaviors.** Immobility time of the mice in the tail suspension test (**A**) and the forced swimming test (**B**). Data are presented as mean  $\pm$  SEM,  $n = 22$  per group for behavior tests. Statistical comparisons were performed by two-way ANOVA. \* $P < 0.05$ , \*\* $P < 0.01$ , \*\*\* $P < 0.001$ , n.s.: no significance.

**Supplementary Table 1. The list of DEGs analyzed by PPI network. (Related to Figure.2E)**

| Gene name | Gene set name                                               | CORT3   | CORT2   | CORT1   | WT3    | WT2    | WT1     |
|-----------|-------------------------------------------------------------|---------|---------|---------|--------|--------|---------|
| Ddit4     | intrinsic apoptotic signaling pathway by p53 class mediator | 142.58  | 146.02  | 146.77  | 78.21  | 71.16  | 90.92   |
| Ifi204    | intrinsic apoptotic signaling pathway by p54 class mediator | 0.25    | 0.25    | 0.12    | 0      | 0.03   | 0       |
| Pmaip1    | intrinsic apoptotic signaling pathway by p55 class mediator | 1.68    | 2.09    | 1.86    | 0.6    | 0.65   | 0.65    |
| Cdkn1a    | intrinsic apoptotic signaling pathway by p56 class mediator | 49.82   | 63.35   | 70.7    | 10.97  | 9.76   | 14.21   |
| Rrp8      | intrinsic apoptotic signaling pathway by p57 class mediator | 10.92   | 10.27   | 14.76   | 6.84   | 5.41   | 6.05    |
| Parp1     | oxidative phosphorylation                                   | 92.79   | 88.06   | 83.66   | 69.45  | 64.88  | 65.67   |
| Ncf1      | oxidative phosphorylation                                   | 8.06    | 8.06    | 6.93    | 4.99   | 4.16   | 5.82    |
| Setx      | oxidative phosphorylation                                   | 10.64   | 9.92    | 9.48    | 9.05   | 7.62   | 7.06    |
| Ucp2      | oxidative phosphorylation                                   | 77.47   | 73.13   | 68.58   | 30.55  | 28.01  | 35.4    |
| Apoe      | oxidative phosphorylation                                   | 4747.87 | 4863.09 | 4470.74 | 5659.6 | 5347.6 | 5769.65 |
| Cyp26b1   | oxidative phosphorylation                                   | 7.06    | 7.04    | 5.04    | 7.96   | 8.26   | 7.5     |
| Trp53inp1 | oxidative phosphorylation                                   | 5.07    | 4.44    | 5.63    | 2.58   | 1.97   | 1.92    |
| Duox2     | oxidative phosphorylation                                   | 0.12    | 0.36    | 0.19    | 0.07   | 0.01   | 0.11    |
| Xdh       | oxidative phosphorylation                                   | 9.39    | 9.24    | 8.28    | 3.37   | 3.97   | 3.8     |
| Akt2      | oxidative phosphorylation                                   | 55.18   | 57.93   | 47.23   | 67.01  | 60.93  | 66.92   |
| Pdk4      | oxidative phosphorylation                                   | 7.3     | 7.46    | 8.47    | 4.09   | 3.51   | 3.64    |
| Gab1      | oxidative phosphorylation                                   | 8.07    | 7.98    | 7.15    | 13.87  | 8.99   | 10.15   |
| Emilin2   | positive regulation of inflammatory response                | 7.03    | 6.34    | 6.77    | 4.79   | 2.12   | 2.73    |
| Mt2       | positive regulation of inflammatory response                | 1446.99 | 1546.45 | 1304.05 | 978.18 | 880.05 | 946     |
| Nppc      | positive regulation of inflammatory response                | 12.65   | 18.29   | 15.53   | 6.96   | 5.83   | 7.91    |
| Pla2g3    | positive regulation of inflammatory response                | 6.16    | 6.45    | 8.31    | 0.87   | 1      | 0.81    |
| Peli1     | positive regulation of inflammatory response                | 21.29   | 20.57   | 20.52   | 15.43  | 15.54  | 14.29   |
| Serpina3n | positive regulation of inflammatory response                | 88.12   | 89.39   | 76.25   | 62.1   | 53.47  | 53.99   |
| Cd59a     | positive regulation of inflammatory response                | 7.74    | 5.37    | 8.03    | 2.73   | 3.59   | 3.3     |
| Il1r1     | positive regulation of inflammatory response                | 4.72    | 4.53    | 4.16    | 3.26   | 3.18   | 3.35    |
| Il7r      | positive regulation of inflammatory response                | 0.35    | 0.23    | 0.38    | 0.07   | 0.04   | 0.12    |

| Gene name | Gene set name                                         | CORT3 | CORT2  | CORT1  | WT3   | WT2   | WT1   |
|-----------|-------------------------------------------------------|-------|--------|--------|-------|-------|-------|
| Tgm2      | positive regulation of inflammatory response          | 16.17 | 17.63  | 13.37  | 6.19  | 5.83  | 11.37 |
| Ctsh      | positive regulation of inflammatory response          | 23.25 | 13.58  | 18.33  | 12.72 | 8.92  | 15.66 |
| Serpina3f | positive regulation of inflammatory response          | 0.87  | 1.28   | 0.31   | 0.04  | 0     | 0.11  |
| Lrg1      | positive regulation of inflammatory response          | 10.47 | 9.45   | 5.47   | 1.99  | 0.66  | 4.91  |
| Irak2     | positive regulation of inflammatory response          | 17.52 | 22.82  | 18.11  | 12.34 | 13.29 | 14.58 |
| Spns2     | positive regulation of inflammatory response          | 78.47 | 82.96  | 80.05  | 59.81 | 57.15 | 60.47 |
| Ldlr      | positive regulation of inflammatory response          | 11.45 | 12.37  | 13.14  | 9.34  | 8.24  | 9.78  |
| Stat5a    | positive regulation of inflammatory response          | 2.08  | 2.84   | 1.88   | 0.71  | 0.55  | 1.37  |
| Arg2      | positive regulation of inflammatory response          | 5.34  | 4.45   | 5.94   | 3.04  | 3.5   | 3.09  |
| Fcgr3     | positive regulation of inflammatory response          | 27.16 | 24.5   | 19.64  | 14.55 | 14.11 | 20.98 |
| Havcr2    | positive regulation of inflammatory response          | 1.83  | 1.73   | 2.41   | 0.99  | 1.59  | 1.11  |
| Il20rb    | positive regulation of inflammatory response          | 5.2   | 4.4    | 4.22   | 3.75  | 2.72  | 2.87  |
| Adamts1   | positive regulation of inflammatory response          | 10.81 | 9.4    | 9.22   | 6.35  | 5.27  | 6.12  |
| Fkbp5     | positive regulation of inflammatory response          | 114.7 | 126.81 | 122.95 | 48.86 | 44.37 | 45.49 |
| Abca1     | positive regulation of inflammatory response          | 5.97  | 6.94   | 6.34   | 5.09  | 3.79  | 4.3   |
| Shb       | positive regulation of inflammatory response          | 15.25 | 12.57  | 18.39  | 9.93  | 11.26 | 11.85 |
| Ada       | positive regulation of inflammatory response          | 4.71  | 4.83   | 4.76   | 0.93  | 0.73  | 0.61  |
| Cebpa     | positive regulation of inflammatory response          | 16.5  | 15.52  | 15.62  | 10.78 | 12.25 | 11.75 |
| Nfkbia    | positive regulation of inflammatory response          | 69.91 | 72.2   | 75.46  | 30.23 | 22.36 | 30.96 |
| Kdr       | regulation of phosphatidylinositol 3 kinase signaling | 2.05  | 2.18   | 1.67   | 4     | 3.26  | 3.23  |

| Gene name | Gene set name                                                | CORT3 | CORT2 | CORT1 | WT3   | WT2   | WT1   |
|-----------|--------------------------------------------------------------|-------|-------|-------|-------|-------|-------|
| Slc9a3r2  | regulation of<br>phosphatidylinositol 4 kinase<br>signaling  | 35.32 | 39.27 | 37.24 | 45.26 | 42.6  | 46.63 |
| Fn1       | regulation of<br>phosphatidylinositol 5 kinase<br>signaling  | 16.8  | 19.25 | 16.72 | 19.26 | 21.66 | 24.92 |
| Pdgfrb    | regulation of<br>phosphatidylinositol 6 kinase<br>signaling  | 6.12  | 5.88  | 6.5   | 7.96  | 6.89  | 7.4   |
| Vegfa     | regulation of<br>phosphatidylinositol 7 kinase<br>signaling  | 24.76 | 30.07 | 30.86 | 36.92 | 48.35 | 39.71 |
| Flt1      | regulation of<br>phosphatidylinositol 8 kinase<br>signaling  | 13.37 | 11.81 | 11.29 | 15.39 | 13.71 | 14.38 |
| Slc9a3r2  | regulation of<br>phosphatidylinositol 9 kinase<br>signaling  | 35.32 | 39.27 | 37.24 | 45.26 | 42.6  | 46.43 |
| Trem2     | regulation of<br>phosphatidylinositol 10 kinase<br>signaling | 25.46 | 26.11 | 20.39 | 31.6  | 35.66 | 34.74 |
| Sox9      | regulation of<br>phosphatidylinositol 11 kinase<br>signaling | 7.56  | 7.17  | 7.92  | 16.04 | 12.07 | 12.3  |
| Tek       | regulation of<br>phosphatidylinositol 12 kinase<br>signaling | 2.79  | 2.92  | 2.45  | 4.41  | 3.95  | 3.74  |
| Adora3    | regulation of<br>phosphatidylinositol 13 kinase<br>signaling | 0.3   | 0.42  | 0.13  | 0.62  | 0.72  | 0.29  |
| Pdgfb     | regulation of<br>phosphatidylinositol 14 kinase<br>signaling | 19.47 | 17.05 | 17.15 | 22.29 | 22.97 | 22.84 |
| Ddr1      | regulation of<br>phosphatidylinositol 15 kinase<br>signaling | 40.24 | 45.97 | 40.03 | 56.47 | 41.88 | 52.64 |
| Reln      | regulation of<br>phosphatidylinositol 16 kinase<br>signaling | 34.4  | 27.68 | 29.44 | 36.58 | 31.86 | 43.01 |
| Ascl1     | response to virus                                            | 4.14  | 3.99  | 5.92  | 5.66  | 5.86  | 7.22  |
| Tagap     | response to virus                                            | 1.29  | 1.07  | 1.66  | 0.39  | 0.3   | 0.42  |
| Nt5c3     | response to virus                                            | 39.63 | 43.62 | 51.45 | 27.76 | 27.35 | 26.08 |

| Gene name | Gene set name                       | CORT3  | CORT2  | CORT1  | WT3    | WT2    | WT1    |
|-----------|-------------------------------------|--------|--------|--------|--------|--------|--------|
| Nmb       | response to virus                   | 5.41   | 11.9   | 5.98   | 4.4    | 3.07   | 4.99   |
| Nlrp6     | response to virus                   | 0.75   | 1.45   | 1.09   | 0.78   | 0.4    | 0.34   |
| Tlr7      | response to virus                   | 1.7    | 1.69   | 1.78   | 0.55   | 0.52   | 0.71   |
| Acod1     | response to virus                   | 0.12   | 0.06   | 0.24   | 0      | 0.03   | 0      |
| Bcl2l1    | response to virus                   | 127.4  | 131.6  | 132.18 | 96.68  | 89.43  | 97.39  |
| Sox18     | fibroblast proliferation            | 10.25  | 11.18  | 10.17  | 16.61  | 16.24  | 17.45  |
| Pax6      | fibroblast proliferation            | 3.83   | 4.93   | 4.73   | 6.59   | 5.43   | 5.84   |
| Gjc2      | fibroblast proliferation            | 12.68  | 16.86  | 12.76  | 21.07  | 14.92  | 19.65  |
| Prrx1     | fibroblast proliferation            | 0.77   | 0.67   | 1.05   | 2.11   | 1.36   | 1.17   |
| Vegfd     | fibroblast proliferation            | 3.27   | 3.23   | 2.82   | 1.9    | 2.02   | 1.53   |
| Fgfr2     | fibroblast proliferation            | 15.99  | 12.8   | 13.17  | 27.11  | 22.9   | 22.07  |
| Gli3      | fibroblast proliferation            | 0.87   | 1.04   | 1.04   | 1.51   | 1.33   | 1.51   |
| Serpine1  | fibroblast proliferation            | 1.45   | 1.9    | 1.7    | 0.4    | 0.46   | 0.38   |
| Gli1      | fibroblast proliferation            | 0.73   | 0.26   | 0.87   | 0.81   | 1.47   | 1.36   |
| Ptch1     | fibroblast proliferation            | 7.33   | 6.78   | 6.73   | 10.56  | 8.34   | 8.88   |
| Nr2e1     | fibroblast proliferation            | 5.68   | 4.85   | 7.55   | 7.91   | 7.61   | 7.06   |
| Zfp361l   | fibroblast proliferation            | 9.73   | 9.4    | 10.61  | 14.89  | 12.92  | 12.33  |
| Fzd9      | fibroblast proliferation            | 2.81   | 3.37   | 2.46   | 5.38   | 4.62   | 4.07   |
| Sox2      | fibroblast proliferation            | 18.74  | 21     | 19.03  | 34.44  | 29.64  | 29.25  |
| Rarg      | fibroblast proliferation            | 3.63   | 3.33   | 4.05   | 5.58   | 4.67   | 5.96   |
| Sox10     | fibroblast proliferation            | 16.59  | 18.21  | 18.69  | 40.75  | 29.76  | 41.4   |
| Pim1      | fibroblast proliferation            | 1.7    | 1.38   | 2.22   | 2.49   | 2.53   | 2.63   |
| Cx3cr1    | fibroblast proliferation            | 8.84   | 8.99   | 7.02   | 20.99  | 20.32  | 21.4   |
| Hdac5     | fibroblast proliferation            | 115.32 | 126.21 | 114    | 154.06 | 141.21 | 143.59 |
| Sall1     | fibroblast proliferation            | 4.05   | 4.27   | 4.77   | 8.07   | 5.64   | 6.24   |
| Tgfb1     | fibroblast proliferation            | 4.23   | 3.72   | 3.21   | 6.87   | 5.44   | 6.87   |
| Mc4r      | adaptive thermogenesis              | 7.76   | 8.52   | 7.59   | 4.39   | 3.4    | 2.97   |
| Gadd45g   | adaptive thermogenesis              | 46.87  | 43     | 43.65  | 25.63  | 28.73  | 30.95  |
| Npr3      | adaptive thermogenesis              | 7.75   | 7.78   | 7.06   | 5.24   | 3.95   | 4.14   |
| Dio2      | adaptive thermogenesis              | 13.72  | 15.05  | 15.46  | 12.62  | 10.68  | 10.4   |
| Il4ra     | adaptive thermogenesis              | 4.6    | 3.54   | 2.09   | 1.86   | 1.85   | 2.65   |
| Ebf2      | adaptive thermogenesis              | 0.59   | 0.47   | 0.12   | 0.22   | 0.06   | 0.07   |
| Prlr      | adaptive thermogenesis              | 2.36   | 1.23   | 0.85   | 0.77   | 0.43   | 0.71   |
| Cebpb     | adaptive thermogenesis              | 21.69  | 21.06  | 21.56  | 14.22  | 15.66  | 17.14  |
| Lpin1     | adaptive thermogenesis              | 11.67  | 12.05  | 12.76  | 9.19   | 8.44   | 8.65   |
| Zbtb7b    | adaptive thermogenesis              | 20.3   | 21.58  | 21.19  | 15.32  | 14.73  | 17.83  |
| Fermt1    | regulation of WNT signaling pathway | 1.07   | 0.23   | 0.7    | 0.64   | 0.52   | 2.89   |
| Arntl     | regulation of WNT signaling pathway | 12.44  | 14.27  | 13.19  | 16.25  | 15.51  | 17.23  |
| Lmbr1l    | regulation of WNT signaling pathway | 3.75   | 6.06   | 6.15   | 11.92  | 8.08   | 7.76   |

| Gene name | Gene set name                       | CORT3  | CORT2  | CORT1  | WT3    | WT2   | WT1    |
|-----------|-------------------------------------|--------|--------|--------|--------|-------|--------|
| Grem1     | regulation of WNT signaling pathway | 0.75   | 1.44   | 1.25   | 2.17   | 1.92  | 1.54   |
| Tmem88b   | regulation of WNT signaling pathway | 24.23  | 29.51  | 24.24  | 38.23  | 25.88 | 29.42  |
| Nkd1      | regulation of WNT signaling pathway | 7.1    | 9.39   | 10.59  | 10.81  | 9.26  | 12.09  |
| Pin1      | regulation of WNT signaling pathway | 36.44  | 33.86  | 28.34  | 37.22  | 36.61 | 41.06  |
| Prickle1  | regulation of WNT signaling pathway | 33.67  | 33.41  | 32.46  | 39.06  | 38.31 | 39.48  |
| Egr1      | regulation of WNT signaling pathway | 82.55  | 77.15  | 87.9   | 106.77 | 99.8  | 110.21 |
| Notum     | regulation of WNT signaling pathway | 0.49   | 2.36   | 0.95   | 2.29   | 1.5   | 2.34   |
| Tle4      | regulation of WNT signaling pathway | 18.78  | 16.47  | 18.67  | 22.59  | 20.95 | 19.9   |
| Rspo2     | regulation of WNT signaling pathway | 11.54  | 9.66   | 11.05  | 14.32  | 12.98 | 16.02  |
| Sox4      | regulation of WNT signaling pathway | 5.05   | 5.67   | 6.41   | 7.88   | 6.48  | 7.78   |
| Col1a1    | regulation of WNT signaling pathway | 1.02   | 0.73   | 0.74   | 1.22   | 1.26  | 2.33   |
| Rnf43     | regulation of WNT signaling pathway | 0.88   | 0.93   | 1.36   | 1.66   | 1.33  | 1.57   |
| Hhex      | regulation of WNT signaling pathway | 0.93   | 0.29   | 0.8    | 1.49   | 1.67  | 1.39   |
| Sox13     | regulation of WNT signaling pathway | 3.64   | 3.95   | 3.73   | 5.39   | 5.39  | 5.56   |
| Apcdd1    | regulation of WNT signaling pathway | 14.21  | 15.19  | 20.19  | 21.56  | 17.84 | 18.44  |
| Sox7      | regulation of WNT signaling pathway | 0.48   | 0.52   | 0.47   | 1.22   | 0.67  | 1.15   |
| Nrarp     | regulation of WNT signaling pathway | 11.27  | 12.4   | 15.14  | 17.11  | 15.27 | 14.14  |
| Angptl4   | response to starvation              | 5.4    | 5.56   | 6.28   | 1.62   | 1.42  | 1.95   |
| Zfp361l   | response to starvation              | 9.73   | 9.4    | 10.61  | 14.89  | 12.92 | 12.33  |
| Fas       | response to starvation              | 3.48   | 2.15   | 2.4    | 1.55   | 0.8   | 1.15   |
| Slc2a1    | response to starvation              | 131.57 | 141.36 | 132.07 | 79.17  | 62.39 | 79.53  |

**Supplementary Table 2. The list of primers used in this study.**

| <b>qPCR primers</b> |         |                         |
|---------------------|---------|-------------------------|
| Actb                | forward | GCTATGTTGCTCTAGACTTCG   |
|                     | reverse | GGATTCCATACCCAAGAAGG    |
| Cdkn1a              | forward | TTGCACTCTGGTGTCTGAG     |
|                     | reverse | GTGATAGAAATCTGTCAGGCTG  |
| Parp1               | forward | GTGCAAACACTACTGCCACAC   |
|                     | reverse | AGTTCATACATGTTTCCAAGGG  |
| Didt4               | forward | CAGAGAAGAGGGCCTTGAC     |
|                     | reverse | GTATGAGGAGTCTTCCTCCG    |
| Trp53inp1           | forward | TCACAGTCGGATATCAGCC     |
|                     | reverse | ATCTTCTGGAGGAAGTAGTTTCC |
| Pmaip1              | forward | CATAACTGTGGTTCTGGCG     |
|                     | reverse | TCGTCCTTCAAGTCTGCTG     |
| Akt2                | forward | TCAGAAGTGGACACAAGGT     |
|                     | reverse | AGGCTGTCATATCGGTCTG     |
